# Supplementary material for: The impact of oxygen partial pressure during sintering on the electrocaloric effect of Ba0.7Sr0.3TiO3 ceramics
Source: Royal Society of Chemistry journal article supplement (doi:10.1039/d2tc03390a), 2022-01-01
Supplement: d2tc03390a1.pdf [file d2tc03390a1.pdf]

## Supporting information

### Impact of Oxygen Partial Pressure during Sintering on the Electrocaloric Effect of $\text{Ba}_{0.7}\text{Sr}_{0.3}\text{TiO}_3$ Ceramics

Wei Liang<sup>a, †</sup>, Xiang Niu<sup>a, †</sup>, Xiaodong Jian<sup>a, \*</sup>, Zhan Zeng<sup>a</sup>, Junying Lai<sup>a</sup>, Ting Wang<sup>c</sup>,  
Weiping Gong<sup>c</sup>, WenHan Zeng<sup>a</sup>, Ying-Bang Yao<sup>a</sup>, Tao Tao<sup>a</sup>, Bo Liang<sup>a</sup> and Sheng-  
Guo Lu<sup>a,b,\*</sup>

<sup>a</sup>Guangdong Provincial Research Center on Smart Materials and Energy Conversion Devices, <sup>a</sup>Guangdong Provincial Key Laboratory of Functional Soft Condensed Matter, School of Integrated Circuits and School of Materials and Energy, <sup>a</sup>Guangdong University of Technology, Guangzhou, 510006, China;

<sup>b</sup>Dongguan South China Design Innovation Institute, Building D-1, University Innovation City Area, Songshan Lake, Dongguan, 523808, China

<sup>c</sup>Guangdong Provincial Key Laboratory of Electronic Functional Materials and Devices, Huizhou University, Huizhou 516001, Guangdong, China.)

† These authors contributed equally: Wei Liang and Xiang Niu.

\*These authors are corresponding authors.

S. G. Lu, [Email: sglu@gdut.edu.cn](mailto:sglu@gdut.edu.cn).

X. D. Jian, [Email: jianxiaodong@gdut.edu.cn](mailto:jianxiaodong@gdut.edu.cn)

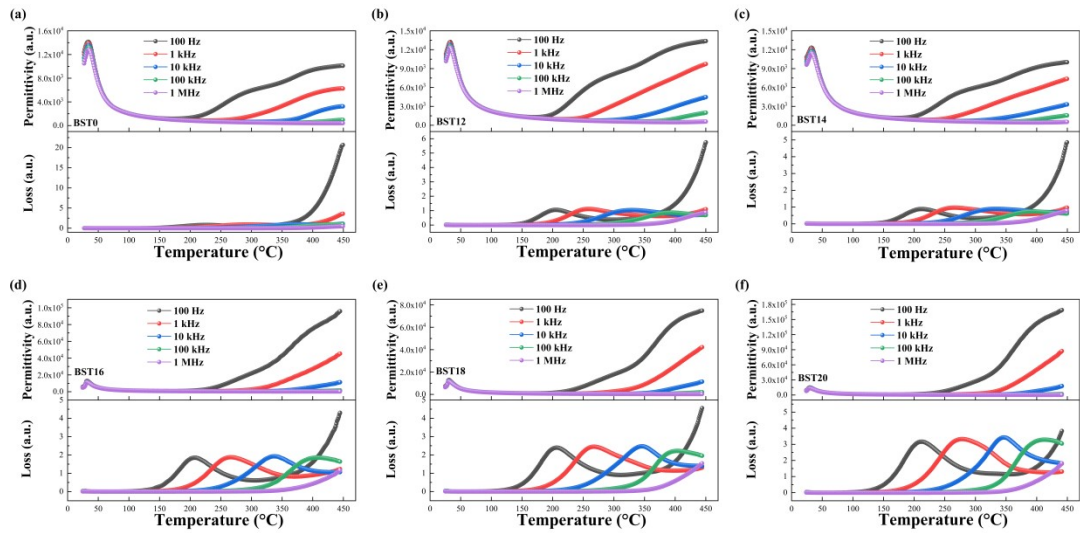

Fig. S1 Temperature-dependent permittivity and dielectric loss at 100 Hz, 1 kHz, 10 kHz, 100 kHz and 1 MHz of  $\text{Ba}_{0.7}\text{Sr}_{0.3}\text{TiO}_3$  bulks sintered under different oxygen pressure conditions.

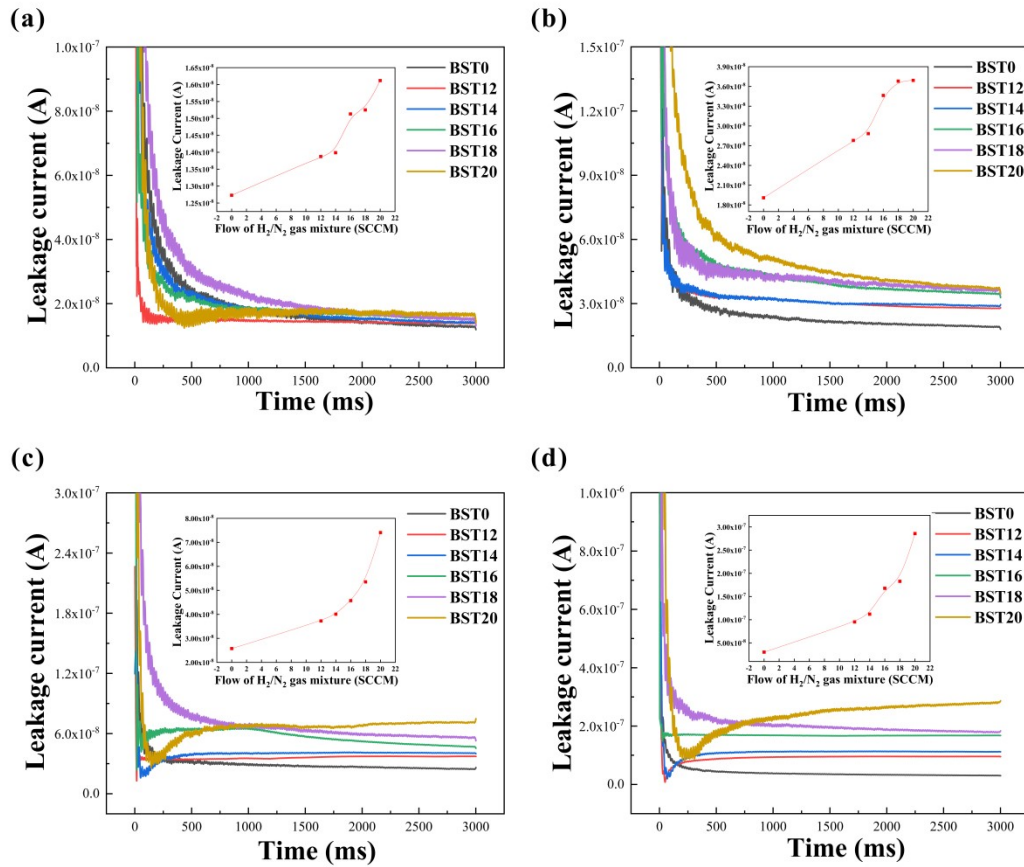

Fig. S2 (a-d) Leakage Current of  $\text{Ba}_{0.7}\text{Sr}_{0.3}\text{TiO}_3$  bulks sintered under different oxygen pressure conditions measured at 30 °C under electric fields of 1, 2, 3, 4 MV/m; The inset of each panel shows the leakage current value.

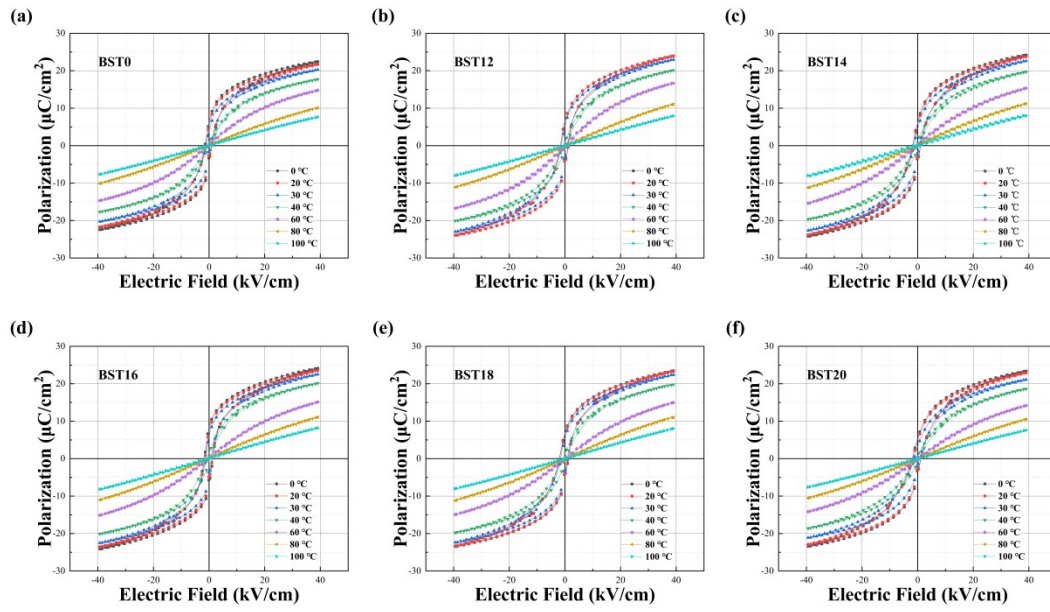

Fig. S3 (a-f) P-E hysteresis loop of  $\text{Ba}_{0.7}\text{Sr}_{0.3}\text{TiO}_3$  bulks sintered under different oxygen pressure conditions at various temperature.
